# Supplementary material for: K-doped CeO2–ZrO2 for CO2 thermochemical catalytic splitting
Source: Royal Society of Chemistry journal article supplement (doi:10.1039/d1ra08315e), 2021-01-01
Supplement: d1ra08315e1.pdf [file d1ra08315e1.pdf]

| Oxidation/Reduction                                                                                                                                     | Kinetic parameter                | CZ             | K <sub>2</sub> CZ | K <sub>7</sub> CZ | K <sub>10</sub> CZ | K <sub>15</sub> CZ | K <sub>20</sub> CZ |
|---------------------------------------------------------------------------------------------------------------------------------------------------------|----------------------------------|----------------|-------------------|-------------------|--------------------|--------------------|--------------------|
| $\sigma_{1 \rightarrow \sigma_{1red}} + \frac{1}{2}O_2$<br>$r_1 = k_1^0 \exp\left(-\frac{E_{1red}}{RT}\right) \theta_1^{n_1}$                           | $k_1^0$ [min <sup>-1</sup> ]     | 1,36 ± 0,0027  | 0,12 ± 0,001      | 0,28 ± 0,0014     | 0,40 ± 0,0014      | 0,17 ± 0,003       | 0,12 ± 0,0006      |
|                                                                                                                                                         | $E_{1red}$ [Jmol <sup>-1</sup> ] | 36738,5 ± 4,42 | 30647 ± 18,44     | 44192,6 ± 5,32    | 62961,5 ± 9,47     | 49951,4 ± 30,05    | 34071 ± 6,83       |
|                                                                                                                                                         | $n_1$                            | 1,31 ± 0,0017  | 1,03 ± 0,0052     | 0,76 ± 0,004      | 0,80 ± 0,0004      | 1,34 ± 0,006       | 0,62 ± 0,003       |
| $\sigma_{2 \rightarrow \sigma_{2red}} + \frac{1}{2}O_2$<br>$r_2 = k_2^0 \exp\left(-\frac{E_{2red}}{RT}\right) \theta_2^{n_2}$                           | $k_2^0$ [min <sup>-1</sup> ]     | 3,94 ± 0,02    | 2,08 ± 0,01       | 2,30 ± 0,011      | 3,20 ± 0,0032      | 2,70 ± 0,004       | 2,30 ± 0,011       |
|                                                                                                                                                         | $E_{2red}$ [Jmol <sup>-1</sup> ] | 100551 ± 60,5  | 59690 ± 11,97     | 94283 ± 8,10      | 80565,5 ± 9,7      | 84629 ± 10,2       | 54846 ± 11         |
|                                                                                                                                                         | $n_2$                            | 0,41 ± 0,002   | 0,80 ± 0,004      | 0,48 ± 0,0024     | 0,63 ± 0,0003      | 0,53 ± 0,0013      | 1,04 ± 0,005       |
| $\sigma_{1red} + CO_2 \rightarrow \sigma_1 + CO$<br>$r_1' = k_1'^0 \exp\left(-\frac{E_{1ox}}{RT}\right) \theta_{1red}^{n_{11}} \cdot Y_{CO_2}^{n_{12}}$ | $k_1'^0$ [min <sup>-1</sup> ]    | 1,24 ± 0,003   | 1,23 ± 0,0062     | 1,04 ± 0,0052     | 1,12 ± 0,0056      | 0,63 ± 0,0011      | 0,16 ± 0,002       |
|                                                                                                                                                         | $E_{1ox}$ [Jmol <sup>-1</sup> ]  | 63197 ± 3,80   | 76053 ± 15,25     | 44475 ± 5,35      | 53433,3 ± 3,57     | 334045 ± 0,75      | 34736 ± 6,95       |
|                                                                                                                                                         | $n_{11}$                         | 1,30 ± 0,0065  | 0,47 ± 0,001      | 0,86 ± 0,0043     | 0,80 ± 0,0007      | 1,27 ± 0,003       | 0,61 ± 0,003       |
|                                                                                                                                                         | $n_{12}$                         | 1,12 ± 0,0067  | 1,80 ± 0,012      | 1,43 ± 0,0071     | 2,06 ± 0,051       | 1,31 ± 0,006       | 1,30 ± 0,006       |
| $\sigma_{2red} + CO_2 \rightarrow \sigma_2 + CO$<br>$r_2' = k_2'^0 \exp\left(-\frac{E_{2ox}}{RT}\right) \theta_{2red}^{n_{21}} \cdot Y_{CO_2}^{n_{22}}$ | $k_2'^0$ [min <sup>-1</sup> ]    | 19,1 ± 0,136   | 25,7 ± 0,13       | 22,7 ± 0,11       | 5,40 ± 0,01        | 1,62 ± 0,002       | 15,10 ± 0,075      |
|                                                                                                                                                         | $E_{2ox}$ [Jmol <sup>-1</sup> ]  | 68956 ± 41,5   | 69964 ± 13,23     | 36289 ± 5,46      | 47649,5 ± 5,73     | 40735,6 ± 4,90     | 42879 ± 8,6        |
|                                                                                                                                                         | $n_{21}$                         | 0,92 ± 0,0046  | 1,14 ± 0,002      | 1,53 ± 0,007      | 0,90 ± 0,001       | 0,85 ± 0,004       | 1,10 ± 0,005       |
|                                                                                                                                                         | $n_{22}$                         | 0,40 ± 0,02    | 1,60 ± 0,008      | 1,25 ± 0,0063     | 0,52 ± 0,004       | 1,45 ± 0,007       | 1,26 ± 0,0063      |

Table S1. Optimized kinetic parameters and their 97% confidence intervals.

| CICLO REDOX                                                                                                                                                 | Parametri cinetici  | CZ            | K <sub>2</sub> CZ | K <sub>7</sub> CZ | K <sub>10</sub> CZ | K <sub>15</sub> CZ | K <sub>20</sub> CZ |
|-------------------------------------------------------------------------------------------------------------------------------------------------------------|---------------------|---------------|-------------------|-------------------|--------------------|--------------------|--------------------|
| $\sigma_{1red} + \sigma_{2 \xrightarrow{k_3} 2red} + \sigma_1$<br>$r_3 = k_3^0 \exp\left(-\frac{E_3}{RT}\right) \theta_{1red}^{n_{13}} \theta_2^{n_{23}}$   | $k_3^0 [min^{-1}]$  | 2,05 ± 0,10   | 2,70 ± 0,04       | 1,81 ± 0,02       | 2,27 ± 0,0045      | 1,66 ± 0,008       | 1,47 ± 0,015       |
|                                                                                                                                                             | $E_3 [Jmol^{-1}]$   | 6897 ± 4,15   | 3012 ± 1,81       | 9631,3 ± 5,8      | 12897 ± 3,10       | 19595 ± 11,80      | 10387,5 ± 20,75    |
|                                                                                                                                                             | $n_{13}$            | 0,46 ± 0,0023 | 1,55 ± 0,007      | 0,84 ± 0,0042     | 0,66 ± 0,0007      | 0,52 ± 0,0026      | 1,20 ± 0,02        |
|                                                                                                                                                             | $n_{23}$            | 1,2 ± 0,0068  | 0,91 ± 0,01       | 1,20 ± 0,006      | 0,91 ± 0,001       | 0,25 ± 0,0003      | 1,34 ± 0,012       |
| $\sigma_1 + \sigma_{2red \xrightarrow{k_3'} 1red} + \sigma_2$<br>$r_3' = k_3'^0 \exp\left(-\frac{E_3'}{RT}\right) \theta_1^{n_{31}} \theta_{2red}^{n_{32}}$ | $k_3'^0 [min^{-1}]$ | 0,75 ± 0,0038 | 0,90 ± 0,004      | 2,30 ± 0,011      | 2,25 ± 0,0067      | 1,36 ± 0,006       | 0,95 ± 0,008       |
|                                                                                                                                                             | $E_3' [Jmol^{-1}]$  | 11196 ± 6,73  | 4357 ± 2,62       | 7695 ± 4,63       | 4495,7 ± 3,78      | 6049 ± 3,64        | 65483 ± 6,56       |
|                                                                                                                                                             | $n_{31}$            | 0,42 ± 0,0021 | 0,43 ± 0,002      | 0,50 ± 0,0025     | 0,84 ± 0,0014      | 0,42 ± 0,00034     | 0,80 ± 0,004       |
|                                                                                                                                                             | $n_{32}$            | 1,16 ± 0,006  | 0,96 ± 0,005      | 0,60 ± 0,003      | 0,77 ± 0,002       | 0,54 ± 0,0004      | 1,10 ± 0,012       |

**Table S2.** Optimized kinetic parameters and their 97% confidence intervals.

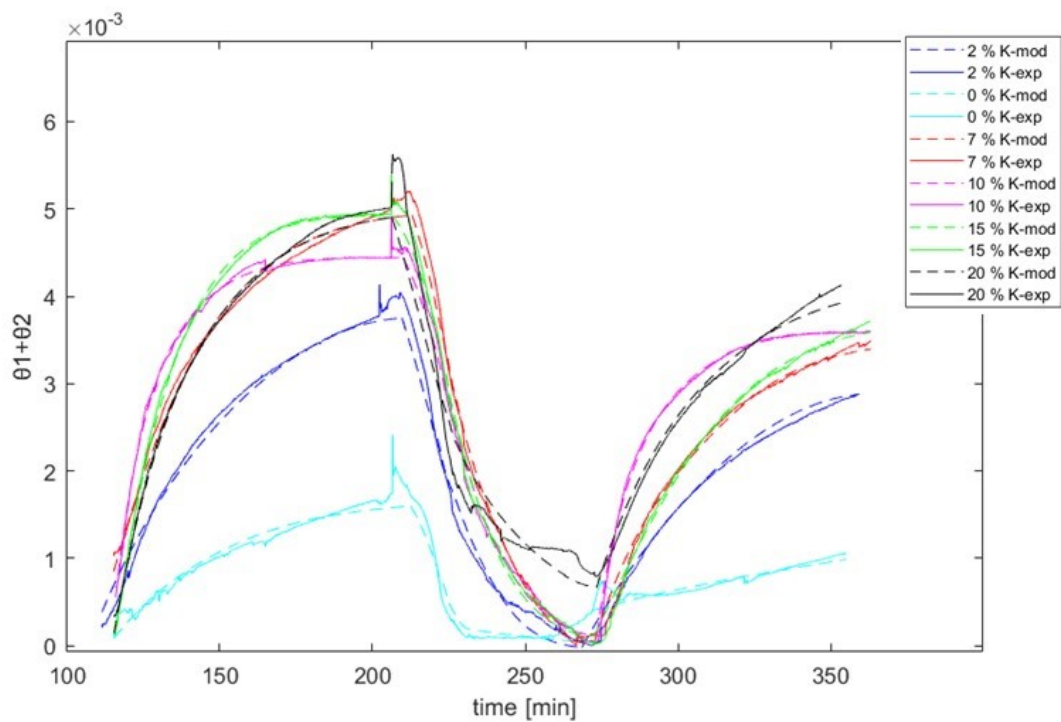

**Fig. S1.** Comparison between experimental data (continuous lines) and simulated data (dashed lines).
